# Supplementary material for: Lyotropic liquid crystalline phases formed in an ionic liquid
Source: Royal Society of Chemistry journal article supplement (doi:10.1039/b411163j), 2004-01-01
Supplement: b411163j.pdf [file b411163j.pdf]

# Supplementary information

## Lyotropic liquid crystalline phases formed in ionic liquid

Luyan Wang, Xiao Chen,\* Yongcun Chai, Jingcheng Hao, Zhenming Sui, Wenchang Zhuang, and Zhenwen Sun

Key Laboratory of Colloid and Interface Chemistry (Shandong University), Ministry of Education, Jinan, Shandong, 250100, P. R. China . Fax: +86-531-8564750; Tel: +86-531-8365420; E-mail: [xchen@sdu.edu.cn](mailto:xchen@sdu.edu.cn)

## Supplementary information 1

**Table 1** Lattice spacings ( $d$ ) of anisotropic phases formed in [Bmim]PF<sub>6</sub> at different temperatures.

| Concentration (%) | Temperature (°C) | Phase                            | $d$ (nm) |
|-------------------|------------------|----------------------------------|----------|
| 45                | 25               | H <sub>1</sub>                   | 12.30    |
|                   | 45               | H <sub>1</sub>                   | 12.70    |
|                   | 65               | H <sub>1</sub>                   | 13.34    |
| 75                | 25               | L <sub><math>\alpha</math></sub> | 10.50    |
|                   | 45               | L <sub><math>\alpha</math></sub> | 10.65    |
|                   | 65               | L <sub><math>\alpha</math></sub> | 10.79    |

## Supplementary information 2

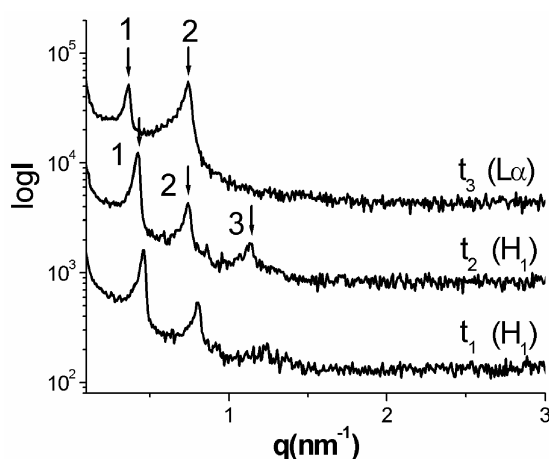

**Fig. 1** SAXS diffraction patterns of anisotropic phases formed in water with 45% P123 concentration.  $t_1$ ,  $t_2$  and  $t_3$  represent 25, 45 and 65 °C respectively. The hexagonal phase is changed to a lamellar phase at 65 °C.

## Supplementary information 3

Textures of anisotropic phases are observed using Motic polarized optical microscope with CCD camera. SAXS is performed on a HMBG-SAX X-ray small angle system (Austria) with Ni-filtered Cu K $\alpha$  radiation (0.154 nm) operating at 50 kV and 40 mA.
